# Supplementary material for: A systematic review of the psychological and social benefits of participation in sport for children and adolescents: informing development of a conceptual model of health through sport
Source: Springer Nature journal article supplement (doi:10.1186/1479-5868-10-98), 2013-01-01

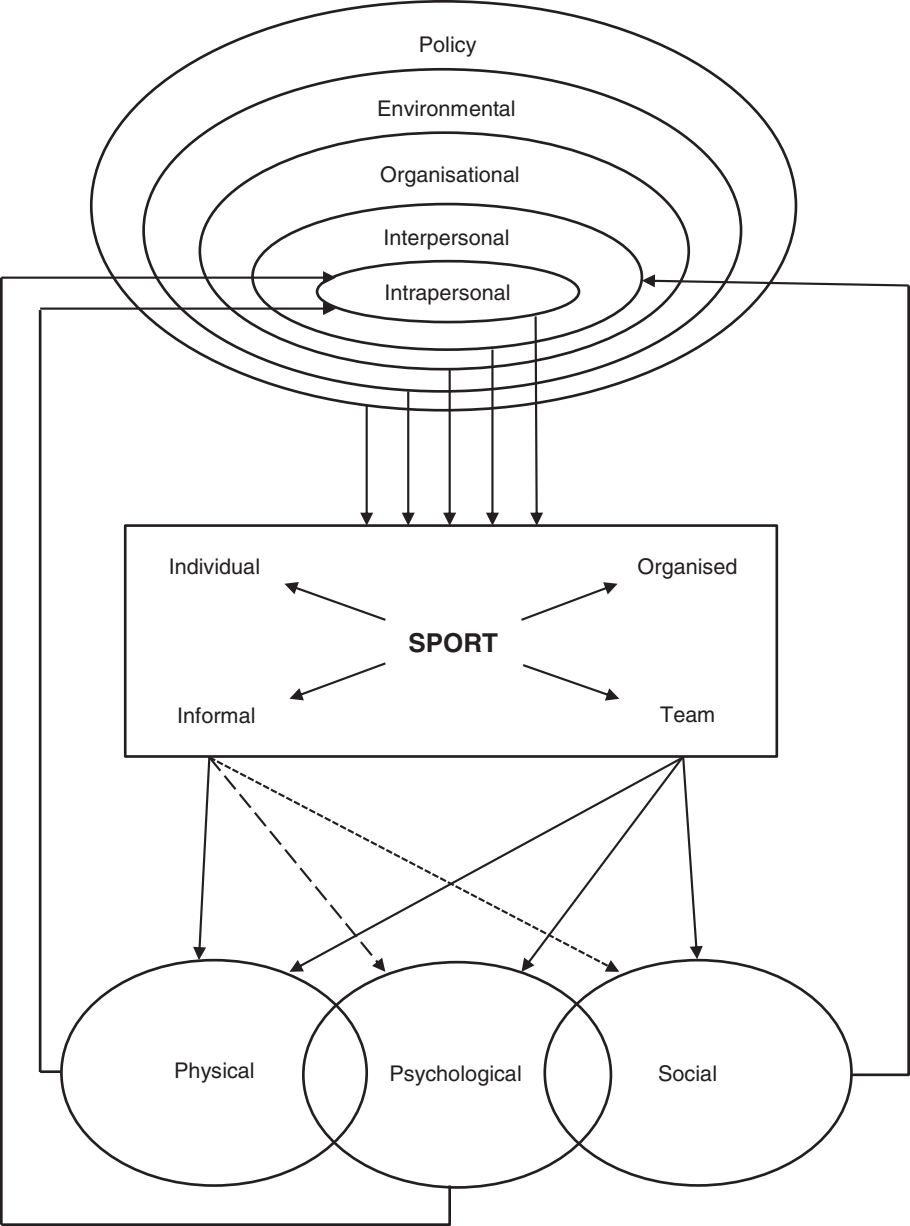

Supplement: 12966_2012_790_MOESM2_ESM.pdf [file 12966_2012_790_MOESM2_ESM.pdf]
